# Supplementary material for: Acquired Senescent T-Cell Phenotype Correlates with Clinical Severity in GATA Binding Protein 2-Deficient Patients
Source: PubMed Central journal article supplement (PMC5506090; doi:10.3389/fimmu.2017.00802), 2017-07-12
Supplement: data_sheet_1.pdf [file data_sheet_1.pdf]

## **SUPPLEMENTARY APPENDIX**

**Title:** Acquired senescent T cell phenotype correlates with clinical severity in GATA2 deficient patients.

**Authors:** Ruiz-García R.<sup>1,2</sup>, Rodríguez-Vigil C.<sup>3</sup>, Marco FM.<sup>4</sup>, Gallego-Bustos F.<sup>1</sup>, Castro-Panete MJ.<sup>1,2</sup>, Diez-Alonso L.<sup>1</sup>, Muñoz-Ruiz C.<sup>4</sup>, Ruiz-Contreras J.<sup>2,5</sup>, Paz-Artal E.<sup>1,2,6,7</sup>, González-Granado LI.<sup>2,5</sup>, Allende LM.<sup>1,2</sup>.

**Supplementary Table 1.** Primers used to amplify and sequence *GATA2* gene.

|                  |                             |
|------------------|-----------------------------|
| INTRON 5 (5'-3') | Fwd: ATCCCCGAAGTTGAGTGTCC   |
|                  | Rev: AGGCTTAAATCGTTCCTGC    |
| EXON 3 (5'-3')   | Fwd: CGGGACTGGTGCTCTTTCT    |
|                  | Rev: AGGAATCGAGCTGCTGAAAA   |
| EXON 4 (5'-3')   | Fwd: CTGGTTCTGGGAGTCGTGAT   |
|                  | Rev: GTCTCGCTCTAATAGCCCCC   |
| EXON 5 (5'-3')   | Fwd: AGACCCTCTCGTCCCTCTTC   |
|                  | Rev: GATGTCAGTTGGGGTCGTCT   |
| EXON 6 (5'-3')   | Fwd: TCCATGGTTCTGAGATGCTTT  |
|                  | Rev: AGGAGGTGGAGCTGGCTAG    |
| EXON 7 (5'-3')   | Fwd: CTATGAAGGTCGGGCACAAT   |
|                  | Rev: TTA CTGTGAATGTTCCCCACC |

**Supplementary Table 2.** Monoclonal antibodies.

| Antigen            | Fluorochrome | Clone       | Company         |
|--------------------|--------------|-------------|-----------------|
| CCR7               | FITC         | 150503      | BD Biosciences  |
| CD107a             | PE           | H4A3        | BD Biosciences  |
| CD11A              | PE           | 25.3        | Beckman Coulter |
| CD11B              | PE           | Bear1       | Beckman Coulter |
| CD123              | PE           | 9F5         | BD Biosciences  |
| CD127              | PE           | Hil-7R-M21  | BD Biosciences  |
| CD16               | FITC         | NKP15       | BD Biosciences  |
| CD18               | FITC         | L130        | BD Biosciences  |
| CD19               | PE-Cy7       | J4.119      | Beckman Coulter |
| CD2                | PE           | S5.2        | BD Biosciences  |
| CD21               | PE           | B-ly4       | BD Biosciences  |
| CD25               | FITC         | M-A251      | BD Biosciences  |
| CD27               | APC-Cy7      | M-T271      | BD Biosciences  |
| CD27               | PE           | 1A4CD27     | Beckman Coulter |
| CD28               | PE           | CD28.2      | BD Biosciences  |
| CD3                | APC-AF750    | UCHT1       | Beckman Coulter |
| CD3                | PerCP-Cy5.5  | SK7         | BD Biosciences  |
| CD38               | PerCP-Cy5.5  | HIT2        | BD Biosciences  |
| CD4                | APC-AF750    | 13B8.2      | Beckman Coulter |
| CD45               | APC          | 2D1         | BD Biosciences  |
| CD45RA             | PE-Cy7       | L48         | BD Biosciences  |
| CD56               | PE-Cy7       | NCAM16.2    | BD Biosciences  |
| CD57               | PE           | NK-1        | BD Biosciences  |
| CD69               | PE           | TP1.55.3    | Beckman Coulter |
| CD8                | APC          | SK1         | BD Biosciences  |
| CD8                | FITC         | SK1         | BD Biosciences  |
| CD95               | FITC         | DX2         | BD Biosciences  |
| CD95               | PE           | DX2         | BD Biosciences  |
| DNAM-1             | FITC         | TX25        | Biolegend       |
| GRANZIME A         | PE           | CB9         | BD Biosciences  |
| GRANZIME B         | FITC         | GB11        | BD Biosciences  |
| HLA-DR             | FITC         | L243        | BD Biosciences  |
| IgD                | FITC         | IA6-2       | BD Biosciences  |
| IgM                | APC          | G20-127     | BD Biosciences  |
| NKg2D              | PE           | 1D11        | Biolegend       |
| NKp44              | PE           | Z231        | Beckman Coulter |
| NKp46              | PE           | 9E2         | Biolegend       |
| PERFORIN           | FITC         | $\delta$ G9 | BD Biosciences  |
| TCR $\alpha\beta$  | FITC         | WT31        | BD Biosciences  |
| TCR $\gamma\delta$ | PE           | B1          | BD Biosciences  |

**Supplementary Table 3.** Clinical score of patients. Described in (9).

|           | <b>HPV</b> | <b>Mycobacterial infection</b> | <b>URTI</b> | <b>Lung</b> | <b>Autoimmunity</b> | <b>Clinical score</b> |
|-----------|------------|--------------------------------|-------------|-------------|---------------------|-----------------------|
| <b>P1</b> |            |                                |             |             |                     | <b>0</b>              |
| <b>P2</b> |            |                                |             |             |                     | <b>0</b>              |
| <b>P3</b> |            |                                | +           | +           |                     | <b>2</b>              |
| <b>P4</b> | +          |                                | +           | +           |                     | <b>3</b>              |

HPV (persistent infection of hands, feet, or perineum with HPV); Myco (any history of mycobacterial infection); URTI (upper respiratory tract infections, more than 3 episodes of recurrent bacterial sinusitis, otitis, or other URTI); Lung (loss of lung volume or transfer factor ,80% predicted, history of bronchiectasis, chronic bronchitis, more than one episode of pneumonia, radiologically or pathologically confirmed pulmonary alveolar proteinosis); AI (autoimmunity: arthritis, panniculitis, or autoimmune cytopenia).

**Supplementary Table 4.** Surface and Intracytoplasmatic markers in CD56<sup>dim</sup> NK cells

|                 | Controls |       | P1    |       |         | P2    |       |         | P3    |       |         | P4     |       |         |
|-----------------|----------|-------|-------|-------|---------|-------|-------|---------|-------|-------|---------|--------|-------|---------|
|                 | mean     | SD    | mean  | sd    | p value | mean  | sd    | p value | mean  | sd    | p value | mean   | sd    | p value |
| <b>CD27</b>     | 3,78     | 2,28  | 32,80 | 11,18 | <0,0005 | 44,80 | 10,41 | <0,0005 | 51,98 | 4,21  | <0,0005 | 24,47  | 2,07  | <0,0005 |
| <b>CD57</b>     | 51,95    | 14,98 | 55,24 | 15,00 | 0,739   | 30,03 | 7,83  | 0,032   | 61,25 | 16,78 | 0,437   | 31,50  | 33,23 | 0,147   |
| <b>Perforin</b> | 87,31    | 8,09  | 83,60 | 6,75  | 0,461   | 40,75 | 30,76 | <0,0005 | 67,43 | 15,32 | 0,005   | 5,34   | 5,57  | <0,0005 |
| <b>GZMA</b>     | 64,08    | 20,19 | 76,40 | -     | -       | 45,90 | 38,18 | 0,351   | 64,05 | 40,80 | 0,999   | 9,10   | 7,22  | 0,006   |
| <b>GZMB</b>     | 69,27    | 11,51 | 33,25 | 29,91 | 0,007   | 14,95 | 2,47  | <0,0005 | 34,50 | 2,96  | 0,002   | 6,78   | 5,95  | <0,0005 |
| <b>CD25</b>     | 0,52     | 0,65  | 5,20  | 2,17  | <0,0005 | 4,12  | 5,37  | 0,015   | 5,76  | 5,32  | 0,001   | 6,56   | 1,20  | <0,0005 |
| <b>CD69</b>     | 3,56     | 3,71  | 18,20 | 18,78 | 0,035   | 34,95 | 13,03 | <0,0005 | 49,06 | 39,82 | 0,002   | 54,23  | 25,45 | <0,0005 |
| <b>CD2</b>      | 64,08    | 18,28 | 65,78 | 7,18  | 0,879   | 63,72 | 16,19 | 0,975   | 51,21 | 7,96  | 0,356   | 73,25  | 20,15 | 0,524   |
| <b>CD8</b>      | 35,23    | 13,64 | 67,22 | 6,07  | 0,001   | 75,11 | 1,20  | <0,0005 | 85,14 | 3,34  | <0,0005 | 68,63  | 13,62 | 0,006   |
| <b>CD16</b>     | 88,81    | 7,02  | 84,42 | 11,38 | 0,447   | 71,30 | 5,67  | 0,001   | 64,51 | 15,87 | 0,001   | 29,07  | 13,29 | <0,0005 |
| <b>DNAM1</b>    | 96,66    | 2,11  | 93,64 | 2,89  | 0,047   | 72,63 | 5,71  | <0,0005 | 82,56 | 7,86  | <0,0005 | 89,67  | 0,47  | <0,0005 |
| <b>NKg2A</b>    | 1,75     | 2,11  | 1,03  | 0,92  | 0,575   | 8,59  | 5,67  | 0,001   | 7,05  | 6,43  | 0,017   | 21,93  | 29,60 | 0,004   |
| <b>NKg2D</b>    | 94,82    | 5,92  | 95,79 | 4,74  | 0,794   | 81,10 | 16,93 | 0,020   | 91,89 | 9,21  | 0,543   | 92,42  | 7,71  | 0,609   |
| <b>NKp44</b>    | 1,09     | 1,34  | 2,23  | 0,69  | 0,182   | 2,89  | 2,38  | 0,083   | 1,21  | 0,76  | 0,910   | 35,56  | 36,14 | <0,0005 |
| <b>NKp46</b>    | 70,08    | 13,09 | 80,28 | 12,64 | 0,237   | 63,72 | 16,04 | 0,471   | 71,16 | 1,64  | 0,911   | 83,81  | 14,58 | 0,190   |
| <b>CD11a</b>    | 99,33    | 0,80  | 99,12 | 1,32  | 0,718   | 96,38 | 6,28  | 0,073   | 97,00 | 4,24  | 0,041   | 98,89  | 1,57  | 0,517   |
| <b>CD11b</b>    | 99,03    | 0,70  | 97,35 | 1,74  | 0,011   | 88,09 | 4,02  | <0,0005 | 93,95 | 0,08  | <0,0005 | 97,50  | 3,54  | 0,102   |
| <b>CD18</b>     | 99,37    | 0,86  | 99,51 | 0,85  | 0,799   | 99,74 | 0,46  | 0,491   | 99,65 | 0,49  | 0,665   | 100,00 | 0,00  | 0,332   |

**Supplementary Table 5.** Surface and Intracytoplasmatic markers in NKT cells.

|                 | Controls |       | P1    |       |         | P2    |       |         | P3    |       |         | P4    |       |         |
|-----------------|----------|-------|-------|-------|---------|-------|-------|---------|-------|-------|---------|-------|-------|---------|
|                 | mean     | sd    | mean  | sd    | p value | mean  | sd    | p value | mean  | sd    | p value | mean  | sd    | p value |
| <b>CD27</b>     | 42,49    | 25,62 | 82,91 | 3,16  | 0,019   | 63,41 | 5,75  | 0,133   | 72,72 | 9,62  | 0,132   | 21,51 | 2,11  | 0,282   |
| <b>CD57</b>     | 47,82    | 23,65 | 57,47 | 18,72 | 0,597   | 53,81 | 14,52 | 0,739   | 61,90 | 12,88 | 0,437   | 63,06 | 5,73  | 0,397   |
| <b>Perforin</b> | 59,49    | 29,74 | 75,50 | 2,23  | 0,504   | 74,06 | 3,90  | 0,543   | 73,00 | 11,41 | 0,577   | 38,74 | 6,94  | 0,397   |
| <b>GZMA</b>     | 65,15    | 20,47 | 86,32 | -     | -       | 79,25 | 8,49  | 0,409   | 98,37 | 0,30  | 0,082   | 88,80 | 2,91  | 0,184   |
| <b>GZMB</b>     | 57,28    | 26,53 | 41,40 | 20,47 | 0,476   | 61,99 | 7,81  | 0,821   | 55,76 | 10,81 | 0,942   | 61,68 | 7,79  | 0,833   |
| <b>CD25</b>     | 3,86     | 4,07  | 3,75  | 2,42  | 0,964   | 1,42  | 1,78  | 0,334   | 0,37  | 0,24  | 0,259   | 1,58  | 2,04  | 0,458   |
| <b>CD69</b>     | 8,87     | 5,60  | 2,95  | 3,85  | 0,196   | 22,23 | 4,07  | 0,004   | 55,67 | 41,95 | 0,003   | 42,39 | 29,37 | 0,004   |
| <b>CD2</b>      | 97,89    | 1,77  | 84,57 | 5,04  | <0,0005 | 86,30 | 12,33 | 0,003   | 69,22 | 2,21  | <0,0005 | 99,42 | 0,59  | 0,261   |
| <b>CD8</b>      | 70,10    | 16,91 | 61,49 | 16,14 | 0,433   | 84,31 | 4,33  | 0,178   | 75,47 | 3,03  | 0,670   | 64,62 | 3,71  | 0,664   |
| <b>CD16</b>     | 5,80     | 5,37  | 3,65  | 0,53  | 0,590   | 2,80  | 2,11  | 0,365   | 3,78  | 4,90  | 0,623   | 5,22  | 5,68  | 0,887   |
| <b>DNAM1</b>    | 93,90    | 6,22  | 91,31 | 2,33  | 0,496   | 75,60 | 3,58  | <0,0005 | 89,94 | 5,75  | 0,408   | 97,82 | 1,13  | 0,400   |
| <b>NKg2A</b>    | 1,85     | 2,06  | 0,66  | 0,43  | 0,348   | 0,97  | 0,46  | 0,419   | 0,41  | 0,21  | 0,353   | 4,24  | 6,00  | 0,227   |
| <b>NKg2D</b>    | 86,03    | 10,84 | 95,71 | 3,36  | 0,155   | 85,72 | 9,41  | 0,964   | 79,20 | 22,63 | 0,466   | 81,28 | 7,81  | 0,565   |
| <b>NKp44</b>    | 1,69     | 2,59  | 1,32  | 0,87  | 0,815   | 0,28  | 0,42  | 0,376   | 1,12  | 0,82  | 0,770   | 6,67  | 8,95  | 0,077   |
| <b>NKp46</b>    | 3,29     | 4,00  | 1,12  | 0,77  | 0,374   | 1,03  | 1,03  | 0,356   | 1,15  | 1,39  | 0,476   | 16,16 | 22,80 | 0,033   |
| <b>CD11a</b>    | 99,40    | 1,09  | 98,15 | 3,08  | 0,216   | 99,91 | 0,13  | 0,436   | 95,00 | 7,07  | 0,018   | 96,63 | 4,63  | 0,040   |
| <b>CD11b</b>    | 74,70    | 15,26 | 87,10 | 7,36  | 0,198   | 69,11 | 12,42 | 0,564   | 89,99 | 1,39  | 0,191   | 91,00 | 12,72 | 0,175   |
| <b>CD18</b>     | 96,91    | 4,42  | 97,71 | 1,88  | 0,766   | 99,97 | 0,05  | 0,260   | 99,90 | 0,01  | 0,369   | 98,99 | 1,39  | 0,530   |

**Supplementary Figure 1. CD8 and NK cells cytolytic molecules and NK cell cytotoxicity in GATA2 deficient patients.**

(A) Percentage of perforin, granzyme A and granzyme B in CD8 T cells (B) Cytotoxicity of NK cells; the results show the percentage of K562 cells incorporating propidium iodide (PI). (C) Percentage of perforin, granzyme A and granzyme B in CD56<sup>dim</sup> NK cells. (D) Percentage of CD16<sup>+</sup> cells in CD56<sup>dim</sup> NK cells represented in accordance to clinical score from patients. CS=0 n=2, CS=2 n=1, CS=3 n=1. Lines represent mean and bars represent the standard error of the mean (SEM). \* $P < 0.05$ ; \*\* $P < 0.01$ ; \*\*\* $P < 0.001$

**Supplementary Figure 2. Representative dot plots of CD56<sup>dim</sup> stains.** CD27, CD25, CD69, DNAM1, CD16 and CD8 expression in CD45<sup>+</sup>CD3<sup>+</sup>CD56<sup>dim</sup> cells from patients and controls.
