# Supplementary material for: Acquired Senescent T-Cell Phenotype Correlates with Clinical Severity in GATA Binding Protein 2-Deficient Patients
Source: PubMed Central journal article supplement (PMC5506090; doi:10.3389/fimmu.2017.00802), 2017-07-12

**A**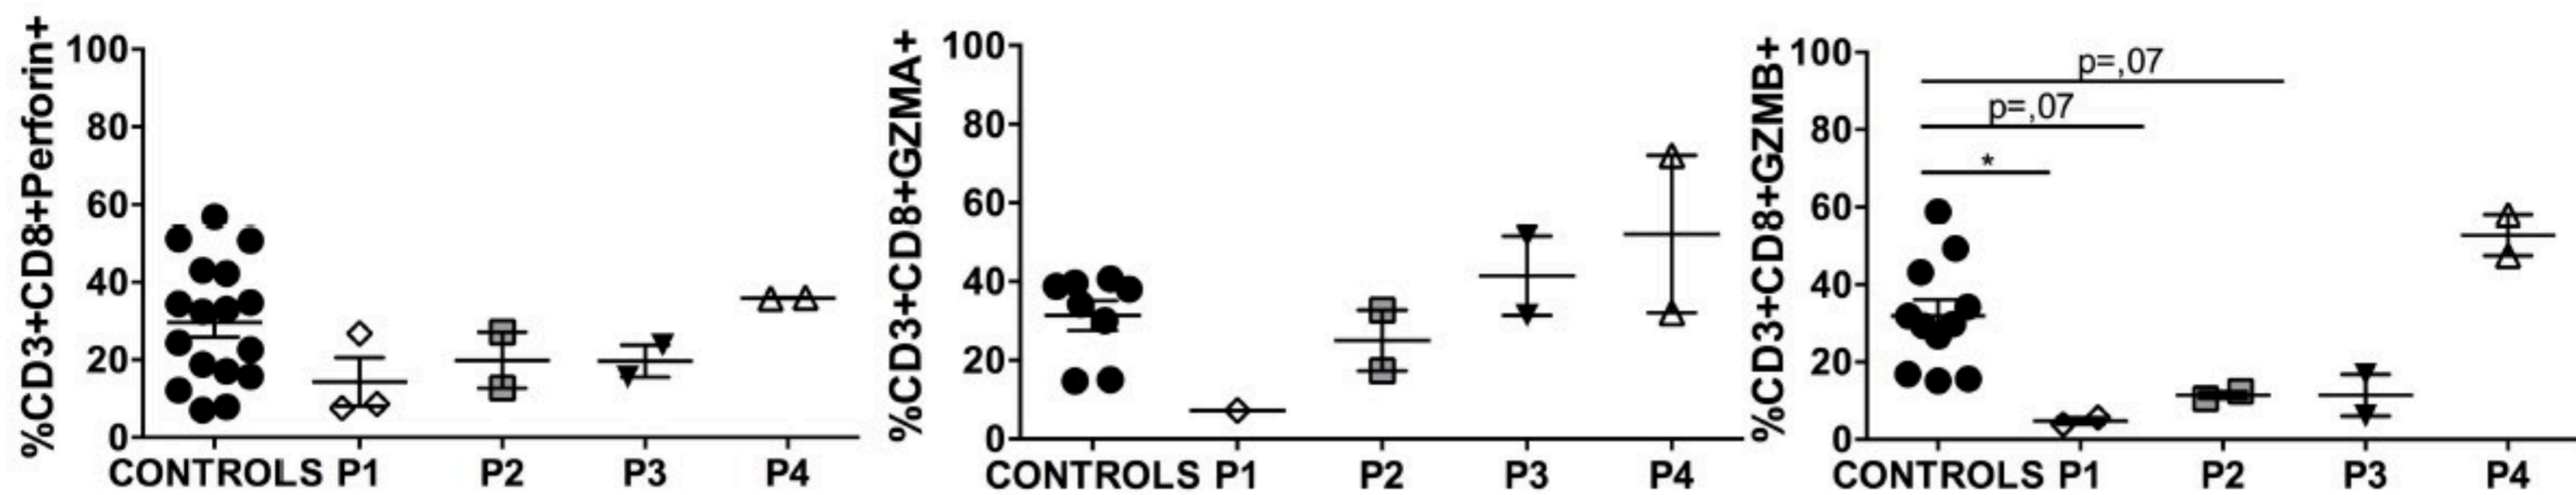**B**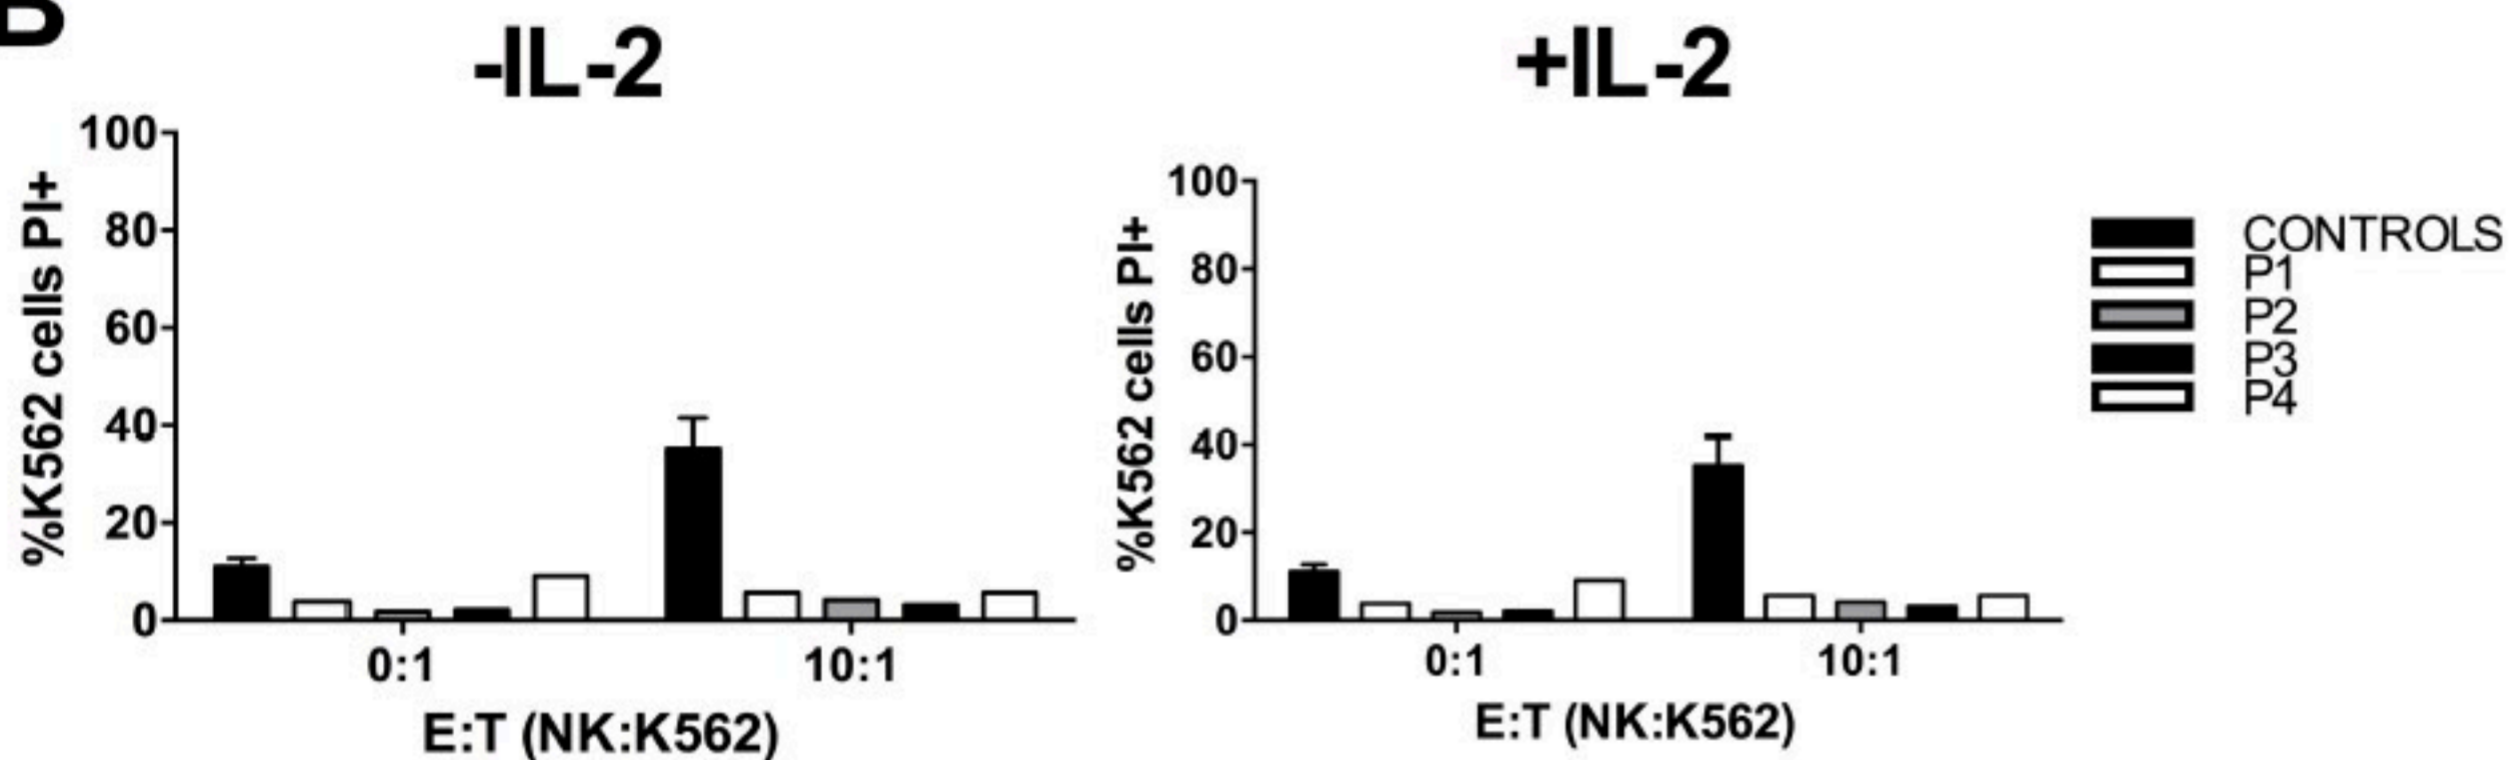**C**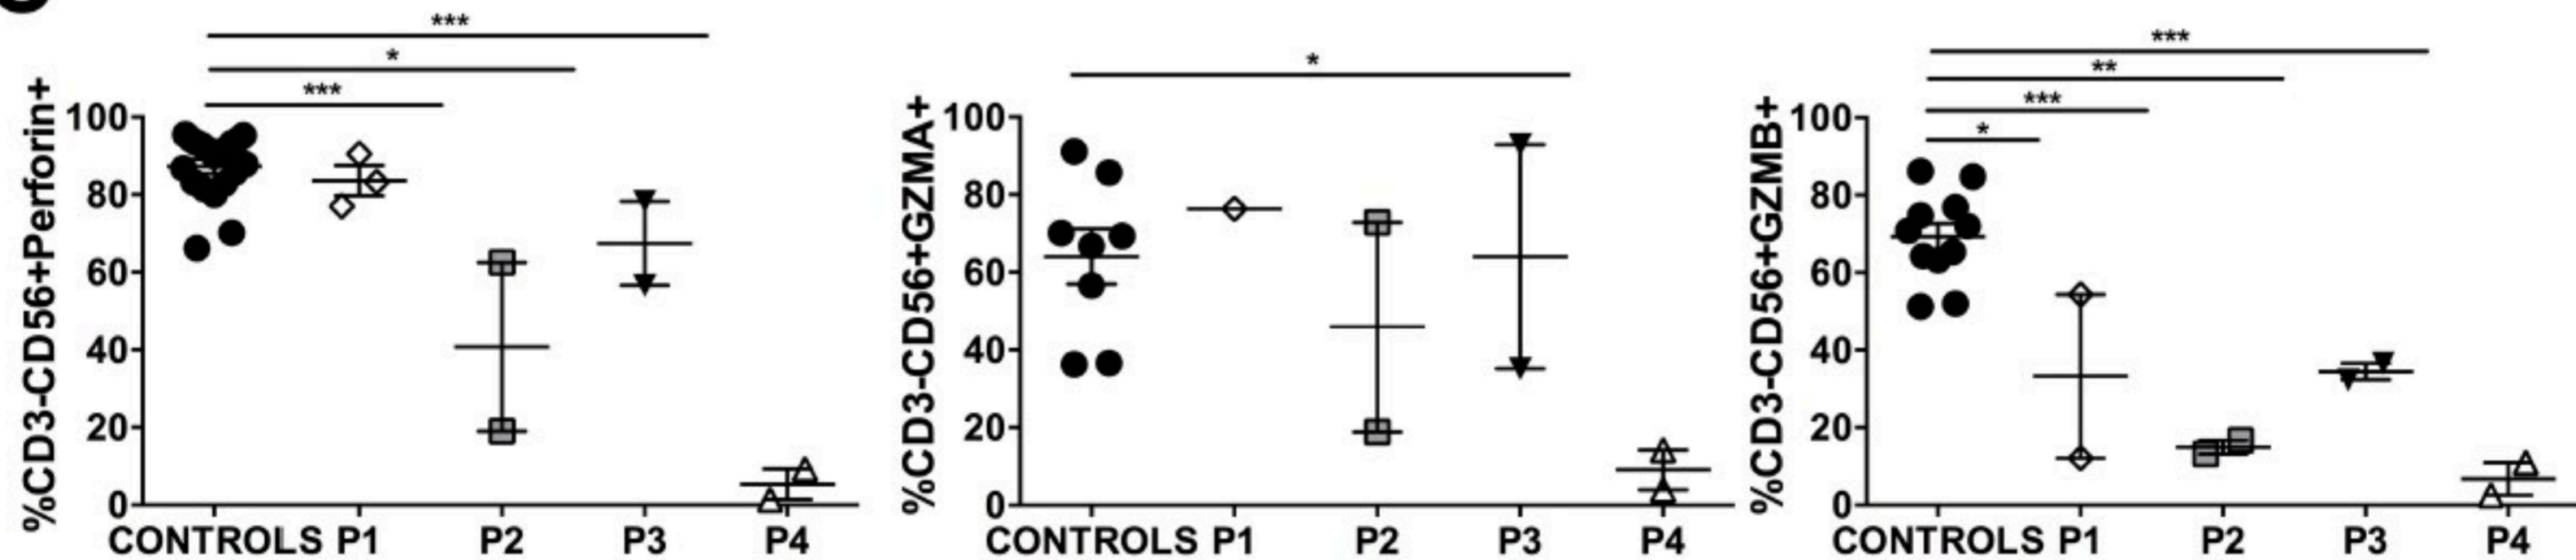**D**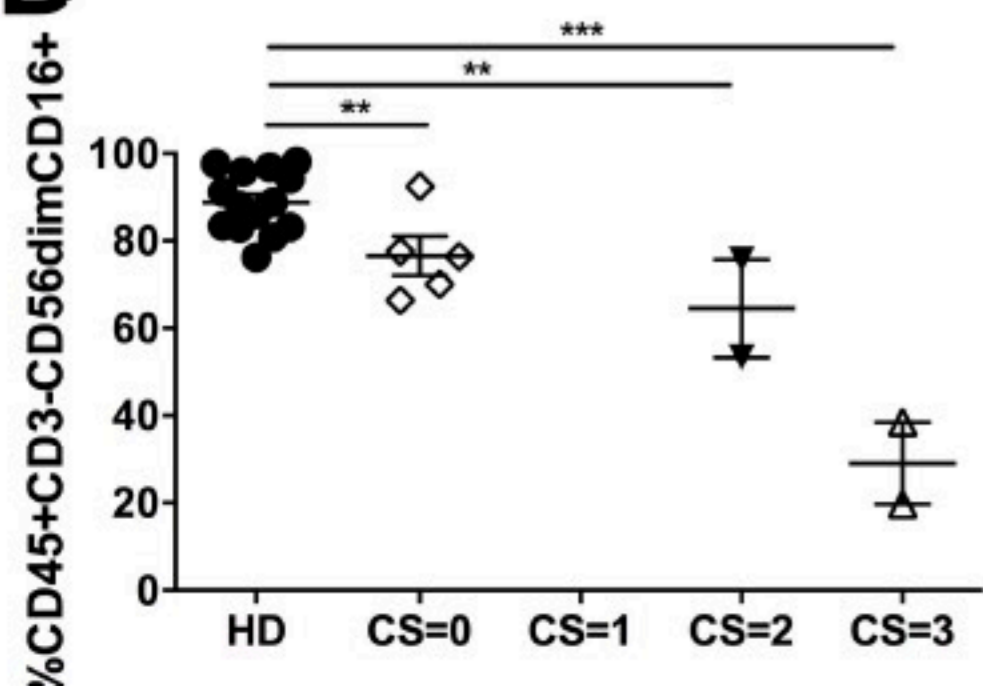

Supplement: image_1.pdf [file image_1.pdf]
