# Supplementary material for: Acquired Senescent T-Cell Phenotype Correlates with Clinical Severity in GATA Binding Protein 2-Deficient Patients
Source: PubMed Central journal article supplement (PMC5506090; doi:10.3389/fimmu.2017.00802), 2017-07-12
Supplement: image_2.pdf [file image_2.pdf]

CD45<sup>+</sup>CD3<sup>-</sup>CD56<sup>dim</sup>

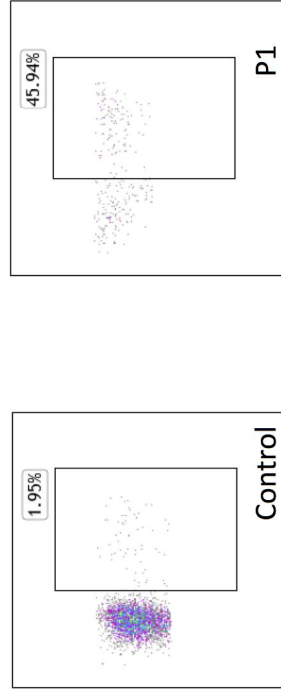

CD27

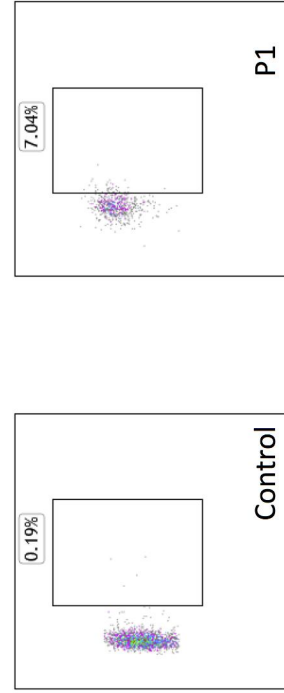

CD25

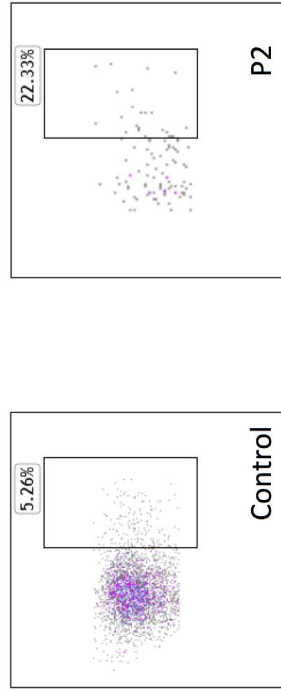

CD69

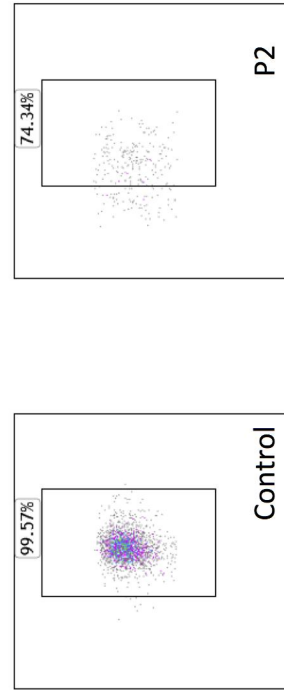

DNAM1

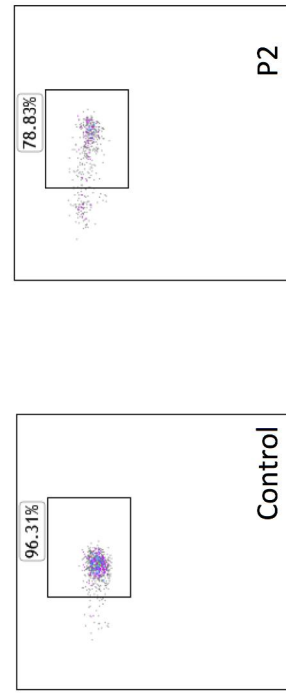

CD16

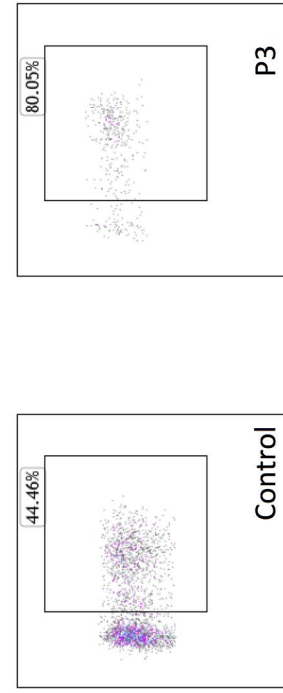

CD8

CD56
